# Supplementary material for: Biomass Chitosan-Based Tubular/Sheet Superhydrophobic Aerogels Enable Efficient Oil/Water Separation
Source: MDPI journal article supplement (doi:10.3390/gels9040346), 2023-04-18
Supplement: s1 [file s1]

# Biomass Chitosan-Based Tubular/Sheet Superhydrophobic Aerogels Enable Efficient Oil/Water Separation

Wenhui Wang <sup>1,2,†</sup>, Jia-Horng Lin <sup>1,2,3,4,†</sup>, Jiali Guo <sup>1,2</sup>, Rui Sun <sup>1,2</sup>, Guangting Han <sup>5</sup>, Fudi Peng <sup>6</sup>, Shan Chi <sup>7</sup> and Ting Dong <sup>1,2,5,\*</sup>

<sup>1</sup> College of Textile and Clothing, Qingdao University, 308, Ningxia Road, Qingdao 266071, China

<sup>2</sup> Advanced Medical Care and Protection Technology Research Center, Qingdao University, 308 Ningxia Road, Qingdao 266071, China

<sup>3</sup> Advanced Medical Care and Protection Technology Research Center, Department of Fiber and Composite Materials, Feng Chia University, Taichung City 407102, Taiwan

<sup>4</sup> School of Chinese Medicine, China Medical University, Taichung City 404333, Taiwan

<sup>5</sup> Key Laboratory of Bio-Fibers and Eco-Textiles, Qingdao University, 308 Ningxia Road, Qingdao 266071, China

<sup>6</sup> Fujian Aton Advanced Materials Science and Technology Co., Ltd., Fujian 350304, China

<sup>7</sup> Bestee Material Co., Ltd., Qingdao 266001, China

\* Correspondence: tingdong09@qdu.edu.cn

† These authors contributed equally to this work.

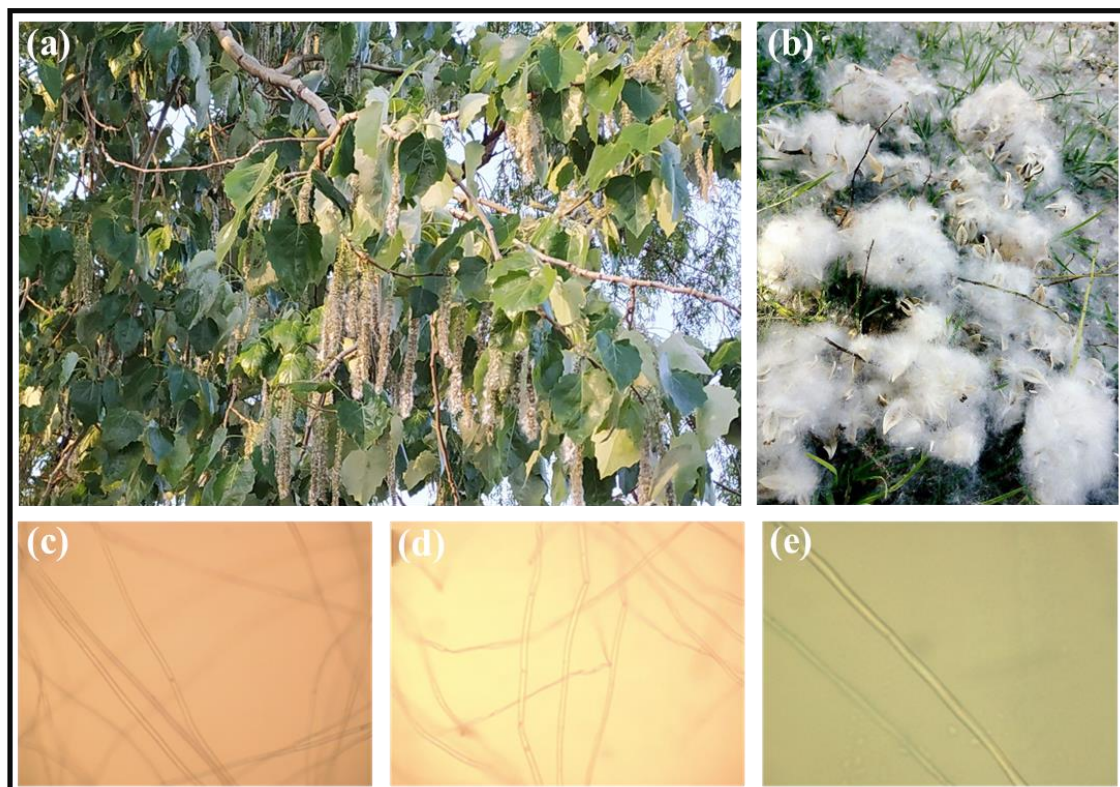

**Figure S1.** (a,b) Camera photos of PC trees/fibers; (c) microscopic image of PC; (d,e) microscopic image of treated PC.

**Table S1.** The oil used in experiments.

| Oil type         | Manufacturer                                            |
|------------------|---------------------------------------------------------|
| Diesel           | China Petroleum and Chemical Corporation Limited        |
| Soybean          | Yihai Jiali Golden Arowana Grain, Oil and Food Co., LTD |
| Motor Oil 0W-20  | Exxon Mobil Corp                                        |
| Motor Oil 5W-40  | Exxon Mobil Corp                                        |
| Motor Oil 20W-50 | Exxon Mobil Corp                                        |
| Pump Oil         | Leybold Optics                                          |

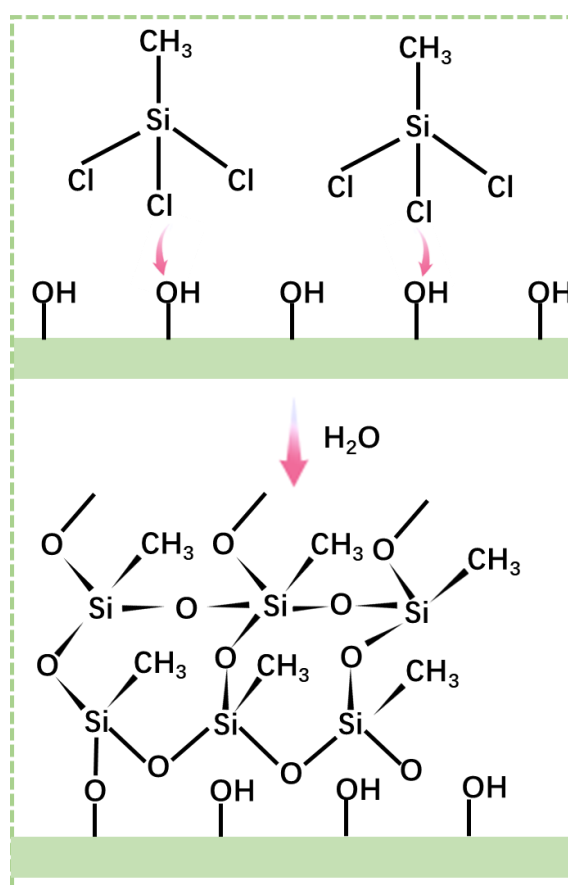

**Figure S2.** Reaction mechanism of MTCS with the material.

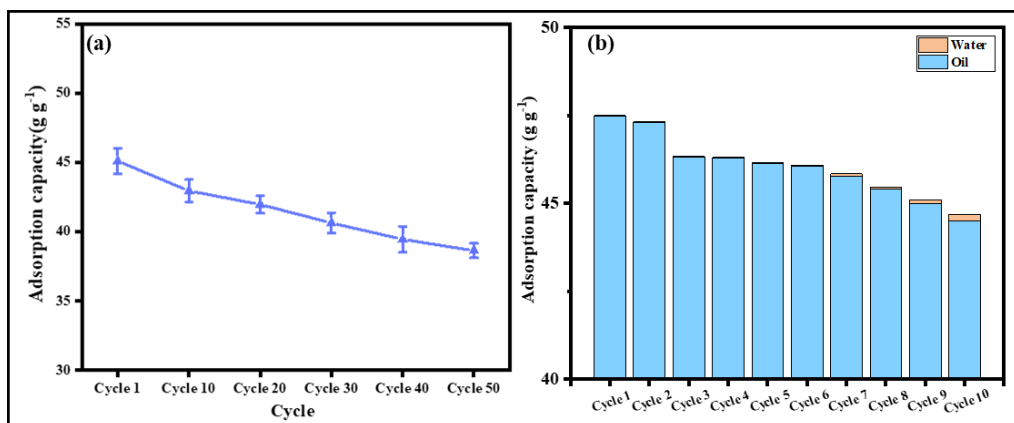

**Figure S3.** (a) Adsorption capacity of soybean oil for 50 cycles, (b) Oil absorption and water absorption of aerogel in 10 cycles.

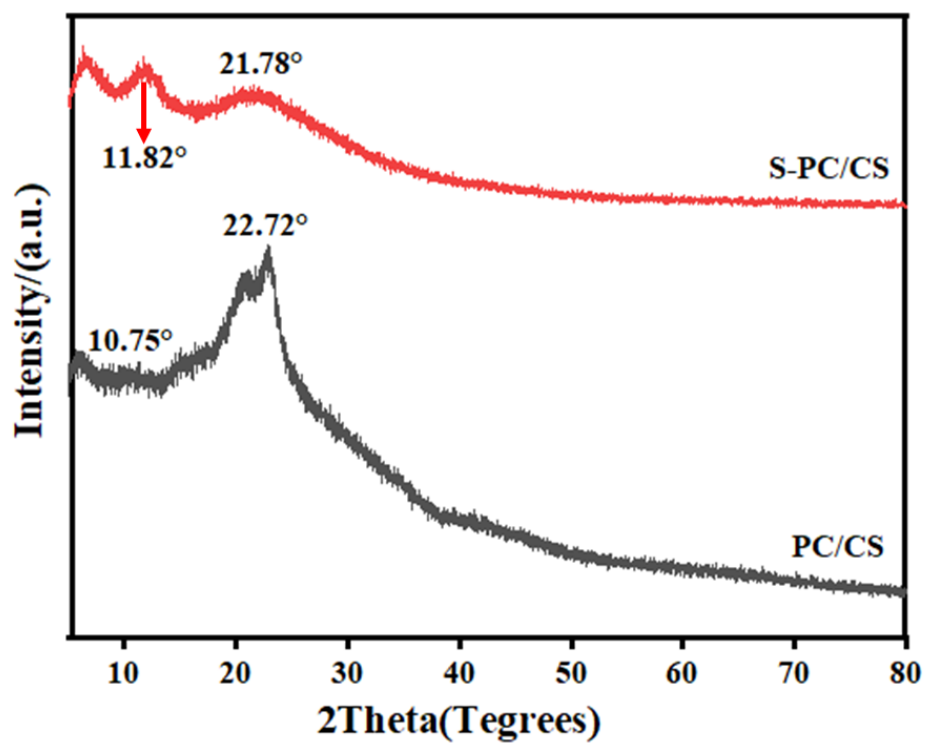

**Figure S4.** XRD patterns of PC/CS and S-PC/CS.
